# Supplementary material
Source: PubMed Central journal article supplement (PMC4621065)
Supplement: JB.00496-15_zjb021153786so1.pdf [file JB.00496-15_zjb021153786so1.pdf]

## Supplemental material

**Table S1. Oligonucleotides used in this study**

| Name                           | Sequence (5'-3')                                                                      | Comments                                                                                                          |
|--------------------------------|---------------------------------------------------------------------------------------|-------------------------------------------------------------------------------------------------------------------|
| <b>Cloning</b>                 |                                                                                       | <b>Restriction sites</b>                                                                                          |
| Pf (0772)                      | ATATCCATGGGTTCTGCCACATCAAATATAAG                                                      | NcoI                                                                                                              |
| Pr (0772)                      | TTAAAAGCTTTCAGTGGTGGTGGTGGTGGGAATTCCAATTAT<br>ATCACC                                  | HindIII                                                                                                           |
| Pf (1049)                      | ATATCATATGTTAGATGAATTGGTTAAAAAGG                                                      | NdeI                                                                                                              |
| Pr (1049)                      | TTAACTCGAGTCATAATTGTTCTTCAATATCTATC                                                   | XhoI                                                                                                              |
| <b>EMSA or helicase assays</b> |                                                                                       |                                                                                                                   |
| S1                             | CAGTGAATTCGAGCTCGGTACCCGGGATCCTCTAGAGTCGACCT<br>GCAGGCATGCAAGCTTG                     | 62-nt ssDNA with a random sequence                                                                                |
| S2                             | CAAGCTTGCATGCCTGCAGGTCGACTCTAGAGGATCCCCGGGTAC<br>CGAGCTCGAATTCCTG                     | 62-nt ssDNA complementary to S1                                                                                   |
| oligo(dT) <sub>62</sub>        | TTTTTTTTTTTTTTTTTTTTTTTTTTTTTTTTTTTTTTTTTTTTTTTTTTTTTTTT<br>TTTTTTTTTTTTT             |                                                                                                                   |
| oligo(dA) <sub>62</sub>        | AAAAAAAAAAAAAAAAAAAAAAAAAAAAAAAAAAAAAAAAAAAAAAAAAAAAAAAA<br>AAAAAAAAAAAAAAAAAAAAAAAAA |                                                                                                                   |
| oligo(dC) <sub>62</sub>        | CCCCCCCCCCCCCCCCCCCCCCCCCCCCCCCCCCCCCCCCCCCCCCCCCCCC<br>CCCCCCCCCCCCCCCCCCC           |                                                                                                                   |
| oligo(dAdG) <sub>62</sub>      | AGAGGAGGGAAGAAGGAAGGGAGGGGAAGGGAGGAGAAAGGG<br>AAGAGGGGAGAGAGAGGAGG                    |                                                                                                                   |
| oligo(ddAC) <sub>62</sub>      | ACACCACCAACAACCAACCCACCCAACCCACCACAAACCCAA<br>CACCCACACACACCACC                       |                                                                                                                   |
| S3                             | CAGTGAATTCGAGCTCGGTACCCGGGATCCTCTAGAGTCGA                                             | 42-nt ssDNA with a random sequence                                                                                |
| S4                             | TCGACTCTAGAGGATCCCCGGGTACCGAGCTCGAATTCCTG                                             | 42-nt ssDNA complementary to S3                                                                                   |
| S5                             | TTTTTTTTTTTTTTTTTTTTTTCAGTGAATTCGAGCTCGGTACCCGGG<br>GATCCTCTAGAGTCGA                  | 62-nt ssDNA with 5'-(dT) <sub>20</sub>                                                                            |
| S6                             | TCGACTCTAGAGGATCCCCGGGTACCGAGCTCGAATTCCTGTTT<br>TTTTTTTTTTTTTTTTTTT                   | 62-nt ssDNA with 3'-(dT) <sub>20</sub>                                                                            |
| S7                             | GTTTGGCTCCCTTGACTACG                                                                  | 20-nt ssDNA with a random sequence                                                                                |
| S8                             | ACCTCTACCTGGACGACCGGTTTTTTTTTTTTTTTTTTTTTTGGGCC<br>AGCAGGTCCATACCA                    | 62-nt ssDNA with a (dT) <sub>20</sub> region in the middle                                                        |
| S9                             | TGGTGATGGACCTGCTGGCCCTTTTTTTTTTTTTTTTTTTTCCCGGT<br>CGTCCAGGTAGAGGT                    | 62-nt ssDNA with a (dT) <sub>20</sub> region in the middle and both terminal regions complementary to those in S8 |

|                                                   |                                                                                                                 |                                                                                                                 |
|---------------------------------------------------|-----------------------------------------------------------------------------------------------------------------|-----------------------------------------------------------------------------------------------------------------|
| S16                                               | CGTAGTCAAGGGAGCCAAAC                                                                                            | 20-nt ssDNA<br>complementary to S7                                                                              |
| S17                                               | CAGTGAATTCGAGCTCGGTACCCGGGATC                                                                                   | 30-nt ssDNA with a random<br>sequence                                                                           |
| S18                                               | GATCCCCGGGTACCGAGCTCGAATTCAGT                                                                                   | 30-nt ssDNA<br>complementary to S17                                                                             |
| S19                                               | "TCCAGTGGGAATCAAGGGTAGGAGATGGTTTGGAAAGCGG<br>AAGTATAGTACGTAAGCGAAATCTCCGCGCCAGGCCATCA<br>GAGTAAAGTTC GTAGTTGCCT | 100-nt ssDNA<br>complementary to OligoA                                                                         |
| S10                                               | TGGTGATGGACCTGCTGGCCC                                                                                           |                                                                                                                 |
| S11                                               | CCCGGTCGTCCAGGTAGAGGT                                                                                           |                                                                                                                 |
| D1                                                | Annealing product of S1 and S2                                                                                  | 62-bp blunt-ended DNA                                                                                           |
| D2                                                | Annealing product of S4 and S5                                                                                  | dsDNA with a 5'-tail                                                                                            |
| D3                                                | Annealing product of S3 and S6                                                                                  | dsDNA with a 3'-tail                                                                                            |
| D4                                                | Annealing product of S5 and S6                                                                                  | Forked DNA                                                                                                      |
| D5                                                | Annealing product of S8 and S9                                                                                  | Bubbled DNA                                                                                                     |
| D6                                                | Annealing product of S8, S10 and S11                                                                            | Gapped DNA                                                                                                      |
| D7                                                | Annealing product of S3 and S4                                                                                  | 42-bp blunt-ended DNA                                                                                           |
| D8                                                | Annealing product of S7 and S16                                                                                 | 20-bp blunt-ended DNA                                                                                           |
| D9                                                | Annealing product of S17 and S18                                                                                | 30-bp blunt-ended DNA                                                                                           |
| D10                                               | Annealing product of S19 and OligoA                                                                             | 100-bp blunt-ended DNA                                                                                          |
| L1                                                | TCGACTCTAGAGGATCCCCGGGTACCGAGCTCGAATTCAGTGT<br>TTTTTTTTTTTTTTTTTT-cy3                                           | Cy3-labeled S6                                                                                                  |
| L2                                                | cy5-TTTTTTTTTTTTTTTTTTTTCAGTGAATTCGAGCTCGGTACCCG<br>GGGATCCTCTAGAGTCGA                                          | Cy5-labeled S5                                                                                                  |
| LD1                                               | Annealing product of L1 and L2                                                                                  | Forked DNA with a 3'-tail<br>labeled with Cy3 and a<br>5'-tail labeled with Cy5                                 |
| LD2                                               | Annealing product of L1 and S5                                                                                  | Forked DNA with a 3'-tail<br>labeled with Cy3                                                                   |
| S12                                               | TTTTTTTTTTTTTTTTTTTTTCGTTTTAGCGAACCTCCCGACTTGC                                                                  | 45-nt primer, with 5'-(dT) <sub>20</sub> ,<br>used in the preparation of<br>the M13-based helicase<br>substrate |
| S14                                               | Biotin-CAGTGAATTCGAGCTCGGTACCCGGGATCCTCT                                                                        | 5' labeled with biotin                                                                                          |
| S15                                               | CAGTGAATTCGAGCTCGGTACCCGGGATCCTCTAGAGTCGA-bioti<br>n                                                            | 3' labeled with biotin                                                                                          |
| S20                                               | TCGACTCTAGAGGATCCCCGGGT                                                                                         | 3' dideoxy                                                                                                      |
| <b>Preparation of a 200-nt circular substrate</b> |                                                                                                                 |                                                                                                                 |
| Oligo A                                           | AGGCAACTACGAACCTACTCTGATGGCCTGGCGCGGAGATTTCGC<br>TTACGTACTATACTCCGCCTTCCAAACCATCTCCTACCCTTGATT<br>CCTACTGGA     | 100-nt ssDNA with a<br>random sequence                                                                          |
| Oligo B                                           | GCTAACCCACATTTTGACGGATACCGCTCAGATTTATTCTCGGGAC                                                                  | 100-nt ssDNA with a                                                                                             |

|           |                                                                                                                                             |                                                                                                   |
|-----------|---------------------------------------------------------------------------------------------------------------------------------------------|---------------------------------------------------------------------------------------------------|
|           | CGCCATTTGTTACGGTACATCTAGCGTCGCACACGAGTTGGGCCA<br>TGGTGACCC                                                                                  | random sequence                                                                                   |
| Bridge AB | TTCGTAGTTGCCT GGGTCACCATGG                                                                                                                  |                                                                                                   |
| Bridge BA | ATGTGGGTTAGC TCCAGTGGGAATC                                                                                                                  |                                                                                                   |
| S13       | TTTTTTTTTTTTTTTTTTTTTTTTTTGAGCGGTATCCGTCAAAATGTGGGTT<br>AGC TCCAGTGGGA ATCAAGGGTA GGAGATGGTT TGGAAGGCGG<br>AAGTATAGTA CGTAAGCGAA ATCTCCGCGC | Primer, with 5'-(dT) <sub>20</sub> , used<br>in the preparation of a<br>200-nt circular substrate |

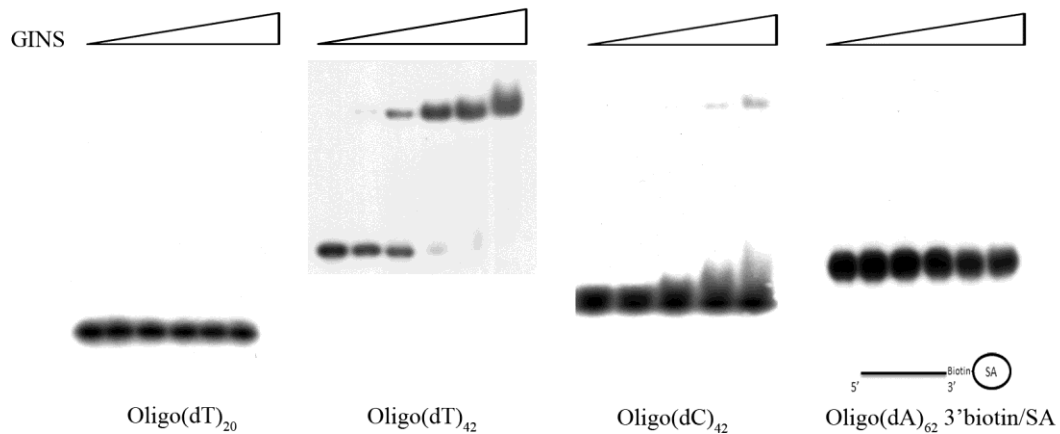

**Figure S1.** Binding of SsoGINS to oligo(dT)<sub>20</sub>, oligo(dT)<sub>42</sub>, oligo (dC)<sub>42</sub> or oligo (dA)<sub>62</sub> with 3'biotin/SA. Concentrations of SsoGINS used in the assays were 0, 0.1, 0.2, 0.4, 0.8, and 1.6 μM, as indicated by a triangle. The protein-DNA complexes were subjected to polyacrylamide gel electrophoresis. The gel was exposed to X-ray film.

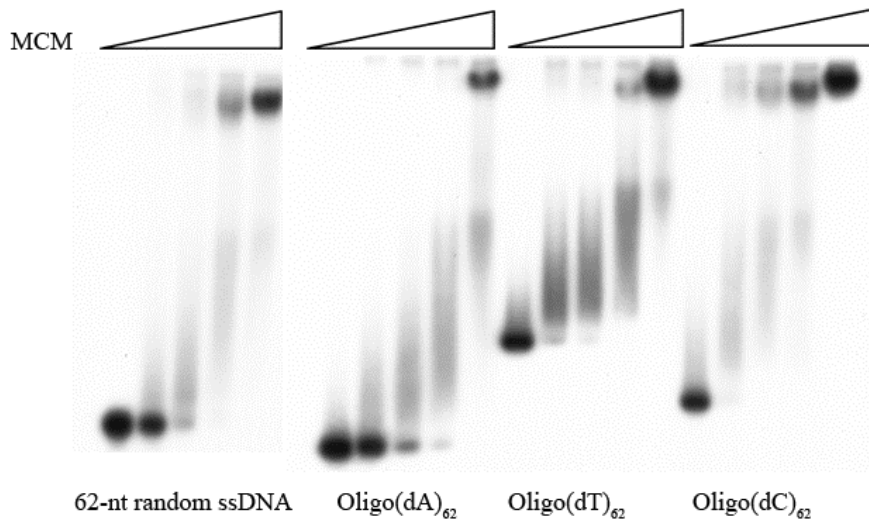

**Figure S2.** Binding of SsoMCM to ssDNA with different sequences. SsoMCM was mixed with a  $^{32}\text{P}$ -labeled 62-nt ssDNA with a random sequence (S1), oligo(dA) $_{62}$ , oligo(dT) $_{62}$  or oligo(dC) $_{62}$ , as indicated. Concentrations of SsoMCM were 0, 0.2, 0.4, 0.8, and 1.6  $\mu\text{M}$ . The protein-DNA complexes were subjected to polyacrylamide gel electrophoresis. The gel was exposed to X-ray film.

A

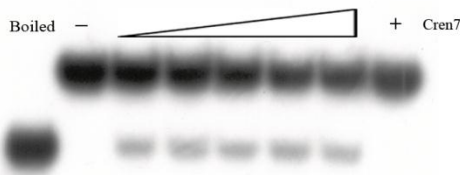

B

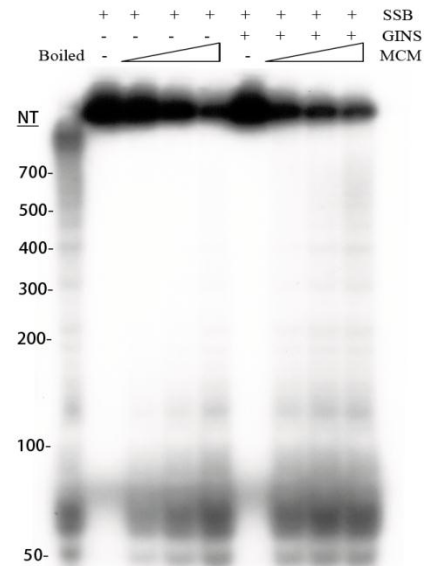

**Figure S3.** Effect of Cren7 on the helicase activity and processivity of SsoMCM. (A) Helicase activity assays were performed with 0.2  $\mu\text{M}$  SsoMCM on a forked DNA substrate (D4) in the presence of increasing amounts of Cren7 (0, 0.5, 1, 2, and 4  $\mu\text{M}$ ). (B) Helicase processivity assays were performed with various amounts of SsoMCM (0, 0.1, 0.2, and 0.4  $\mu\text{M}$ ) on a radiolabeled M13-based substrate in the presence of 1  $\mu\text{M}$  Cren7. SsoGINS (1  $\mu\text{M}$ ) was added as indicated. The gel was exposed to X-ray film.

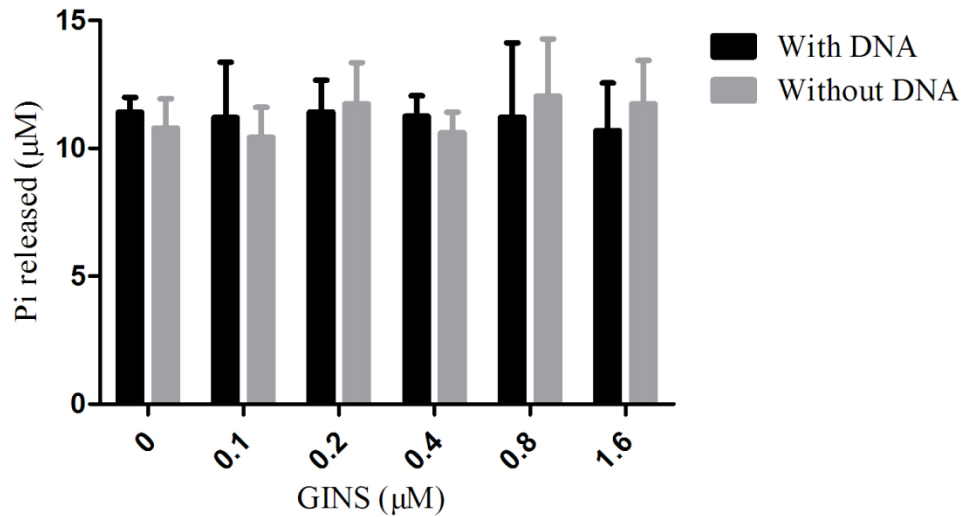

**Figure S4.** Effect of SsoGINS on the ATPase activity of SsoMCM. The standard reaction mixture (20  $\mu$ l) contained 25 mM HEPES-NaOH, pH 7.0, 50 mM sodium acetate, 5 mM  $MgCl_2$ , 1 mM DTT, 0.1 mg/ml BSA, 100  $\mu$ M  $[\gamma\text{-}^{32}P]ATP$  (1  $\mu$ Ci), and 0.2  $\mu$ M SsoMCM. Increasing amounts of SsoGINS (0, 0.1, 0.2, 0.4, 0.8, and 1.6  $\mu$ M) were added in the presence or absence of DNA (D4, 0.5  $\mu$ M). Reaction mixtures were incubated for 30 min at 55°C, and quenched with 5  $\mu$ l of 50 mM EDTA. Aliquots (1  $\mu$ l) of the reaction mixtures were subjected to thin-layer chromatography on a polyethyleneimine-cellulose plate (Macherey-Nagel) in 1 M formic acid–0.5 M LiCl. ATP hydrolysis was quantitated by Phosphorimaging.

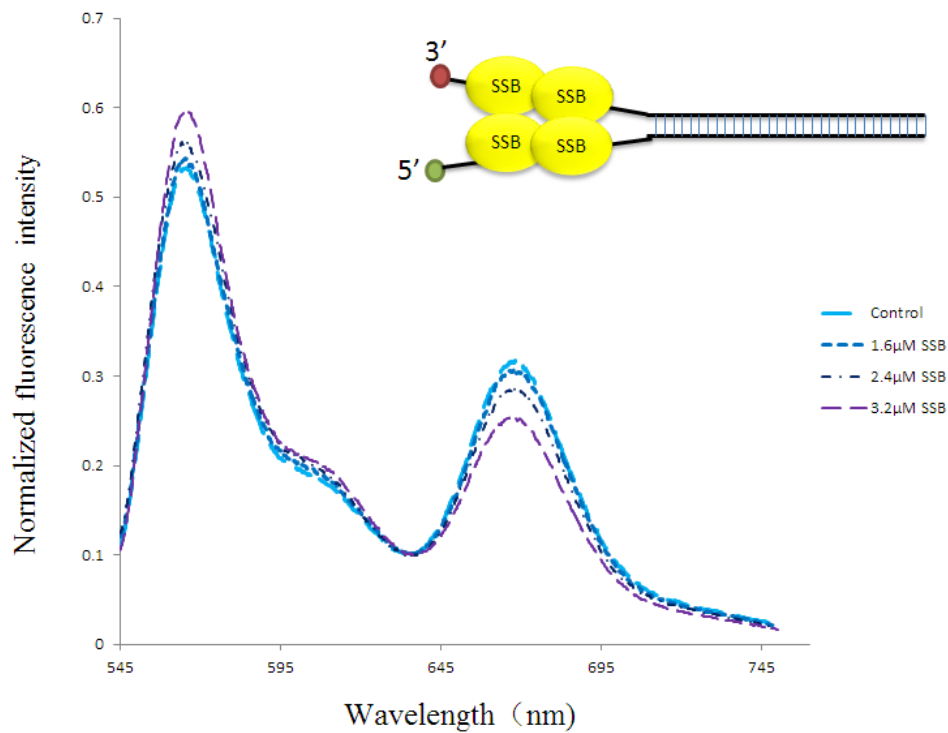

**Figure S5.** Effect of binding by SsoSSB to a forked DNA molecule on the distance between the two single-stranded tails of the DNA. SsoSSB were mixed with a forked DNA molecule with a 3'-oligo(dT)<sub>20</sub> tail labeled at the 3' end with Cy3 and a 5'-oligo(dT)<sub>20</sub> tail labeled at the 5' end with Cy5 (LD1). Fluorescence intensity was recorded over a range of wavelength from 545 to 750 nm. Cartoons show the proposed effect of the binding of SsoSSB on the distance between the two single-stranded tails of the forked DNA.

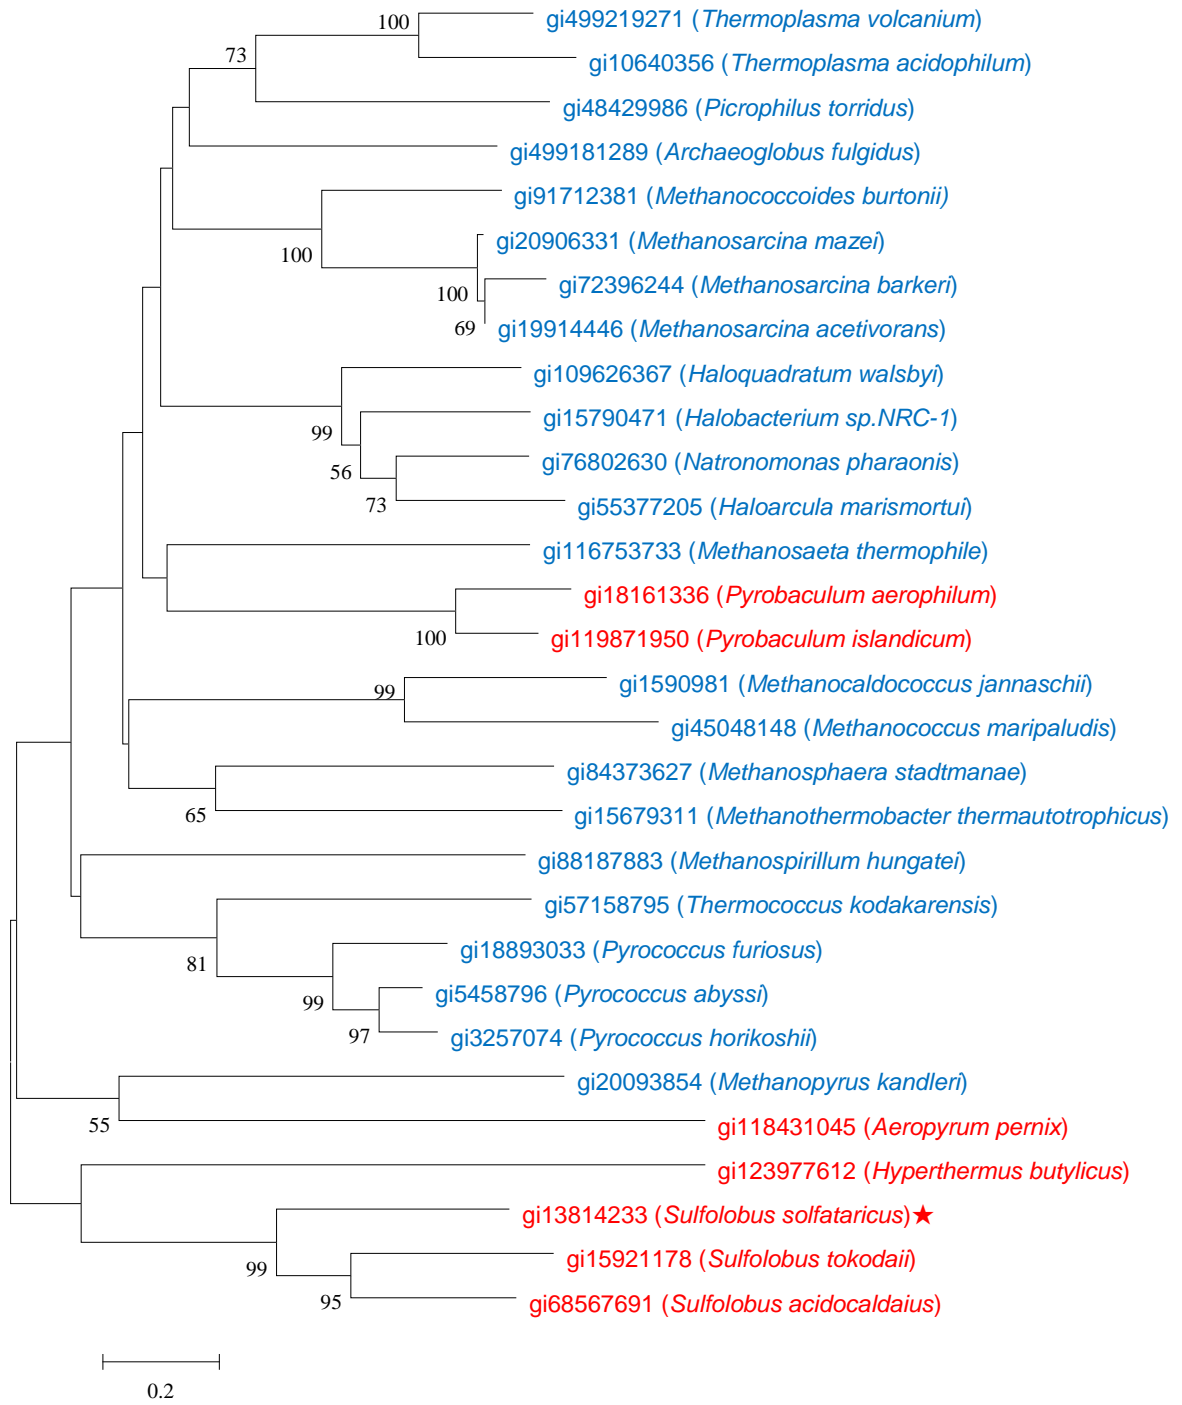

A

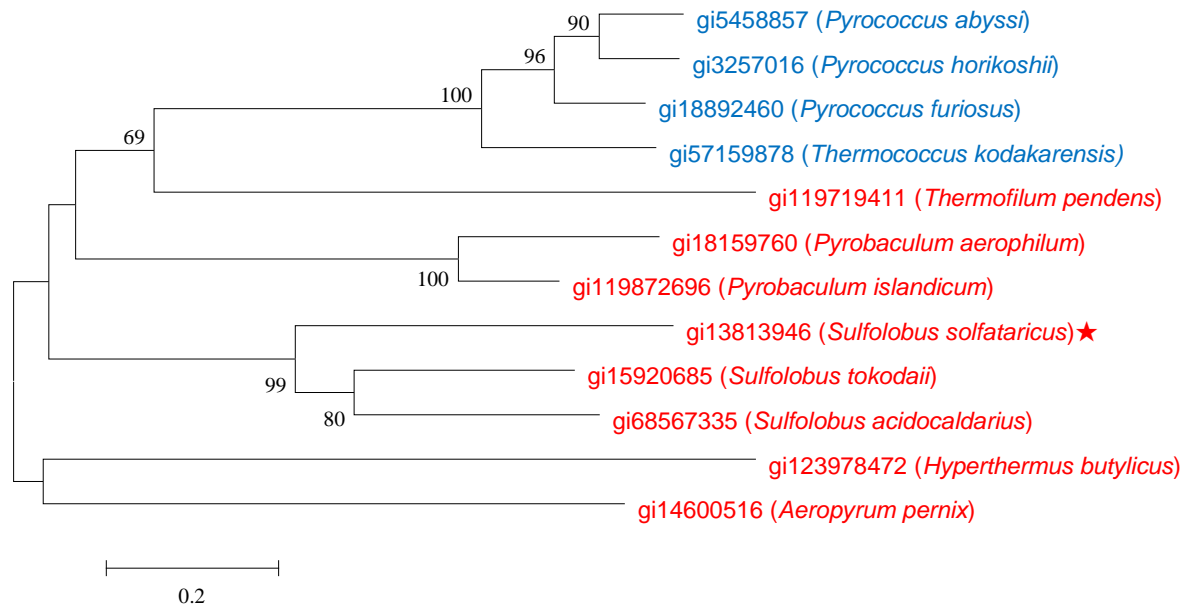

## B

**Figure S6.** Phylogenetic dendrograms of Gins51 (A) and Gins23 (B) from archaeal GINS family members. Multiple sequence alignments were obtained by using MUSCLE (<http://www.ebi.ac.uk/Tools/msa/muscle/>). The tree was reconstructed using the neighbour-joining method. Bootstrap values were obtained with 1,000 replicates and only values >50 % are shown. The source organisms and GI numbers are given. The names of euryarchaea and crenarchaea are shown in blue and red, respectively. The GINS from *S. solfataricus* are denoted by a star.
